# Supplementary material for: Systematic Two-Hybrid and Comparative Proteomic Analyses Reveal Novel Yeast Pre-mRNA Splicing Factors Connected to Prp19
Source: PLoS One. 2011 Feb 28;6(2):e16719. doi: 10.1371/journal.pone.0016719 (PMC3046128; doi:10.1371/journal.pone.0016719)
Supplement: Table S1 — Yeast strains used in this study. (DOC) [file pone.0016719.s008.doc]

**Table S1 Strains used in this study**

**Strain Genotype Source**

***S. pombe* strains**

KGY246 *ade6-M210 ura4-D18 leu1-32* h- Lab stock

KGY2312 *prp19-myc13::kan R ade6-M21X ura4-D18 leu1-32* h+ Lab stock

KGY3369 *cwf11::ura4+* *ade6-M21X ura4-D18 leu1-32* h- This study

KGY4244 *smg1-myc13::kan R ade6-M210 ura4-D18 leu1-32* h- This study

KGY5687 *prp17-myc13::kan R ade6-M210 ura4-D18 leu1-32* h+ This study

KGY5693 *prp17-TAP::kan R ade6-M210 ura4-D18 leu1-32* h+ This study

KGY5850 *prp17-myc13::kan R prp19-myc13::kan R cwf7-HA3::KanR* This study

*ade6-M21X ura4-D18 leu1-32* h-

KGY6440 *prp19-GFP::kan R prp17-myc13::kan R* This study

*ade6-M21X ura4-D18 leu1-32* h+

KGY6464 *dre4-54 ura4-D18 ade6-M21X leu1-32 can1-1* h-S. Forsburg

KGY6467 *dre4-myc13::kan R ade6-M210 ura4-D18 leu1-32* h+ This study

KGY6468 *dre4-GFP::kan R ura4-D18 leu1-32* *ade6-M210* h+ This study

KGY6488 *dre4-GFP::kan R prp19-myc13::kan R ura4-D18 leu1-32* This study

*ade6-M210* h+

KGY6541 *prp19-GFP::kan R ade6-M216 ura4-D18 leu1-32* h- Lab stock

KGY6756 *cdc5-myc13::kan R dre4-myc13::kan R cwf7-HA3::KanR* This study

*ade6-M216 ura4-D18 leu1-32* h?

KGY6819 *dre4-TAP::kan R ade6-M210 ura4-D18 leu1-32* h- This study

KGY6907 *saf1-flag3::kan R ade6-M210 ura4-D18 leu1-32* h- This study

KGY6909 *saf3-TAP::kan R ade6-M210 ura4-D18 leu1-32* h- This study

KGY6912 *saf3-GFP::kan R ade6-M210 ura4-D18 leu1-32* h- This study

KGY7003 *prp19-TAP::kan R ade6-M210 ura4-D18 leu1-32* h- This study

KGY7007 *saf1-flag3::kan R dre4-GFP::kan R* h-  This study

*ade6-M21X ura4-D18 leu1-32*

KGY7041 *prp19-TAP::kan R cdc5-myc13::kan R dre4-GFP::kan R* h- This study

*ade6-M21X ura4-D18 leu1-32*

KGY7042 *prp19-TAP::kan R cwf2-myc13::kan R dre4-GFP::kan R* h- This study

*ade6-M21X ura4-D18 leu1-32*

KGY7043 *prp19-TAP::kan R prp17-myc13::kan R dre4-GFP::kan R* h+ This study *ade6-M21X ura4-D18 leu1-32*

KGY7044 *saf1::ura4+ ade6-M21X ura4-D18 leu1-32* h- This study

KGY7060 *saf3+/saf3::ura4+ade6-M210/ade6-M216 ura4-D18/ura4-D18* This study

*leu1-32/leu1-32* h+/h-

KGY7187 *prp19-TAP::kan R prp17-myc13::kan R cwf2-GFP::Kan R* This study

*ade6-M210 ura4-D18 leu1-32* h+

KGY7212 *prp2-1 ura4-D18 leu1-32* h-Lab stock

KGY7577 *saf2-TAP::kan R ade6-M216 ura4-D18 leu1-32* h- This study

KGY7922 *cwf2-TAP::kan R ade6-M210 ura4-D18 leu1-32* h- Lab stock

KGY9141  *saf2-TAP::kan R prp19-myc13::kan R* h-  This study

*ade6-M21X ura4-D18 leu1-32*

KGY9142  *saf1-flag3::kan R prp19-myc13::kan R* h-  This study

*ade6-M21X ura4-D18 leu1-32*

KGY9143 *prp17-HA3-TAP::kan R**ade6-M216 ura4-D18 leu1-32* h- This study

KGY9144 *dre4-HA3-TAP::kan R ade6-M216 ura4-D18 leu1-32* h- This study

KGY9412 *saf2-GFP::kan R ade6-M210 ura4-D18 leu1-32* h- This study

KGY9503 *saf2-GFP::kan R dre4-myc13::kan R ade6-M210 leu1-32* h- This study

*ura4-D18*

KGY9742 *saf2+/saf2::ura4+ade6-M210/ade6-M216 ura4-D18/ura4-D18* This study

*leu1-32/leu1-32* h+/h-

KGY9921 *saf3-GFP::kan R prp19-myc13::kan R ade6-M21X leu1-32* h- This study

*ura4-D18*

KGY10009 *saf3-GFP::kan R dre4-myc13::kan R ade6-M21X leu1-32* h- This study

*ura4-D18*

KGY10032 *saf1-HA3-TAP::kan R* h- This study

KGY10033 *saf2-HA3-TAP::kan R* h- This study

KGY10034 *saf3-HA3-TAP::kan R* h- This study

KGY10188 *cwf11::ura4+* *saf1::ura4+ ade6-M21X ura4-D18 leu1-32* h- This study

KGY10239 *cwf11::ura4+* *dre4::kanR ade6-M21X ura4-D18 leu1-32* h- This study

KGY11251 *byr4-linker-TAP*:: *kanR ade6-M21X ura4-D18 leu1-32* h- This study

***S. cerevisiae* strains**

KGY5311 *URN1-TAP2::His3MX6 MATa ura3Δ0 met15Δ0 leu2Δ0 his3Δ1* Open Biosystems KGY5754 *PRP17-GFP::KanR MATα, ura3-52, lys2-801, ade2-101,* This study

*leu2-Δ1, his3-Δ200*

KGY5755 *CWC2-GFP::KanR MATα, ura3-52, lys2-801, ade2-101,* This study

*leu2-Δ1, his3-Δ200*

KGY5757 *MIH1-GFP::KanR MATα, ura3-52, lys2-801, ade2-101,* This study

*leu2-Δ1, his3-Δ200*

KGY5758 *URN1-GFP::KanR MATα ura3-52 lys2-801 ade2-101 leu2-Δ1* This study

*his3-Δ200*

KGY10056 *AIM4-myc13::kanR MATa ura3-52 lys2-801 ade2-101leu2-∆1* This study

*trp1-∆1*

KGY10178 *AIM4-TAP2::HIS3MX6 MATa ura3Δ0 met15Δ0 leu2Δ0 his3Δ1* Open Biosystems

KGY10707 *CWC2-myc13::kan R URN1-GFP::kan R* MAT? *ura3-52 lys2-801* This study

*ade2-101 leu2-Δ1, trp1-Δ1? his3-Δ200?*

KGY10127 *AIM4-myc::kanR URN1-gfp::kanR MAT? ura3-52. lys2-801* This study

*ade2-101 leu2-Δ1, trp1-Δ1? his3-Δ200?*
